# Supplementary material
Source: publisher figshare collection journal article supplement (https://plos.figshare.com/articles/dataset/_/7631453)
Supplement: Supplementary file [file 1]

S2 Table. Models' Estimates of S2 Fig.

| Indep. variables                             | Dep. var. age   |        | Dep. var. gender    |        |
|----------------------------------------------|-----------------|--------|---------------------|--------|
|                                              | Linear ML model |        | (Logistic ML model) |        |
|                                              | Coef.           | S.E.   | Coef.               | S.E.   |
| Party/Leader (ref. Farage)                   |                 |        |                     |        |
| Corbyn                                       | -6.88***        | (1.18) | -0.27*              | (0.14) |
| Cameron                                      | -8.93***        | (1.15) | 0.49***             | (0.14) |
| Johnson                                      | -0.02           | (1.17) | 0.15                | (0.14) |
| UKIP                                         | 3.96***         | (1.22) | 0.19                | (0.15) |
| Tories                                       | -4.84***        | (1.22) | -0.01               | (0.15) |
| Labour                                       | -4.29***        | (1.18) | 0.14                | (0.15) |
| Constant                                     | 43.68***        | (0.92) | 0.35***             | (0.10) |
| Level-2 variance (ln)                        | 0.53            | (0.40) | -2.02***            | (0.41) |
| Level-1 variance (ln)                        | 2.83***         | (0.01) |                     |        |
| Observations                                 | 4.153           |        | 4.153               |        |
| Number of level-2 units (posts)              | 56              |        | 56                  |        |
| Standard errors in parentheses               |                 |        |                     |        |
| *** $p < 0.01$ , ** $p < 0.05$ , * $p < 0.1$ |                 |        |                     |        |
