# Supplementary material
Source: publisher figshare collection journal article supplement (https://plos.figshare.com/articles/dataset/_/7631453)
Supplement: Supplementary file [file 1]

S3 Table. Models' Estimates of Fig 5.

|                         | Age<br>detected    | Age<br>(BES 2016)  | Gender<br>detected | Gender<br>(BES 2016) |
|-------------------------|--------------------|--------------------|--------------------|----------------------|
| Indep. variables        | Coef.              | Coef.              | Coef.              | Coef.                |
| Remain vote choice/Like | -7.20***<br>(0.87) | -5.20***<br>(0.97) | 0.01<br>(0.10)     | 0.06<br>(0.10)       |
| Constant                | 47.94***<br>(0.65) | 46.17***<br>(0.72) | 0.47***<br>(0.08)  | 0.49***<br>(0.08)    |
| Level-2 variance (ln)   | 0.79***<br>(0.19)  |                    | -0.61***<br>(0.12) |                      |
| Level-1 variance (ln)   | 2.83***<br>(0.01)  |                    |                    |                      |
| Observations            | 4.11               | 1.184              | 4.11               | 1.285                |
| Number of groups        | 56                 | -                  | 56                 | -                    |

Standard errors in parentheses

\*\*\*  $p < 0.01$ , \*\*  $p < 0.05$ , \*  $p < 0.1$
